# Supplementary material for: SCDC: bulk gene expression deconvolution by multiple single-cell RNA sequencing references
Source: PubMed Central journal article supplement — Brief Bioinform. 2020 Jan 10;22(1):416–27. doi: 10.1093/bib/bbz166 (PMC7820884; doi:10.1093/bib/bbz166), 2020-01-10
Supplement: supp_figures_20191030_bbz166.pdf [file supp_figures_20191030_bbz166.pdf]

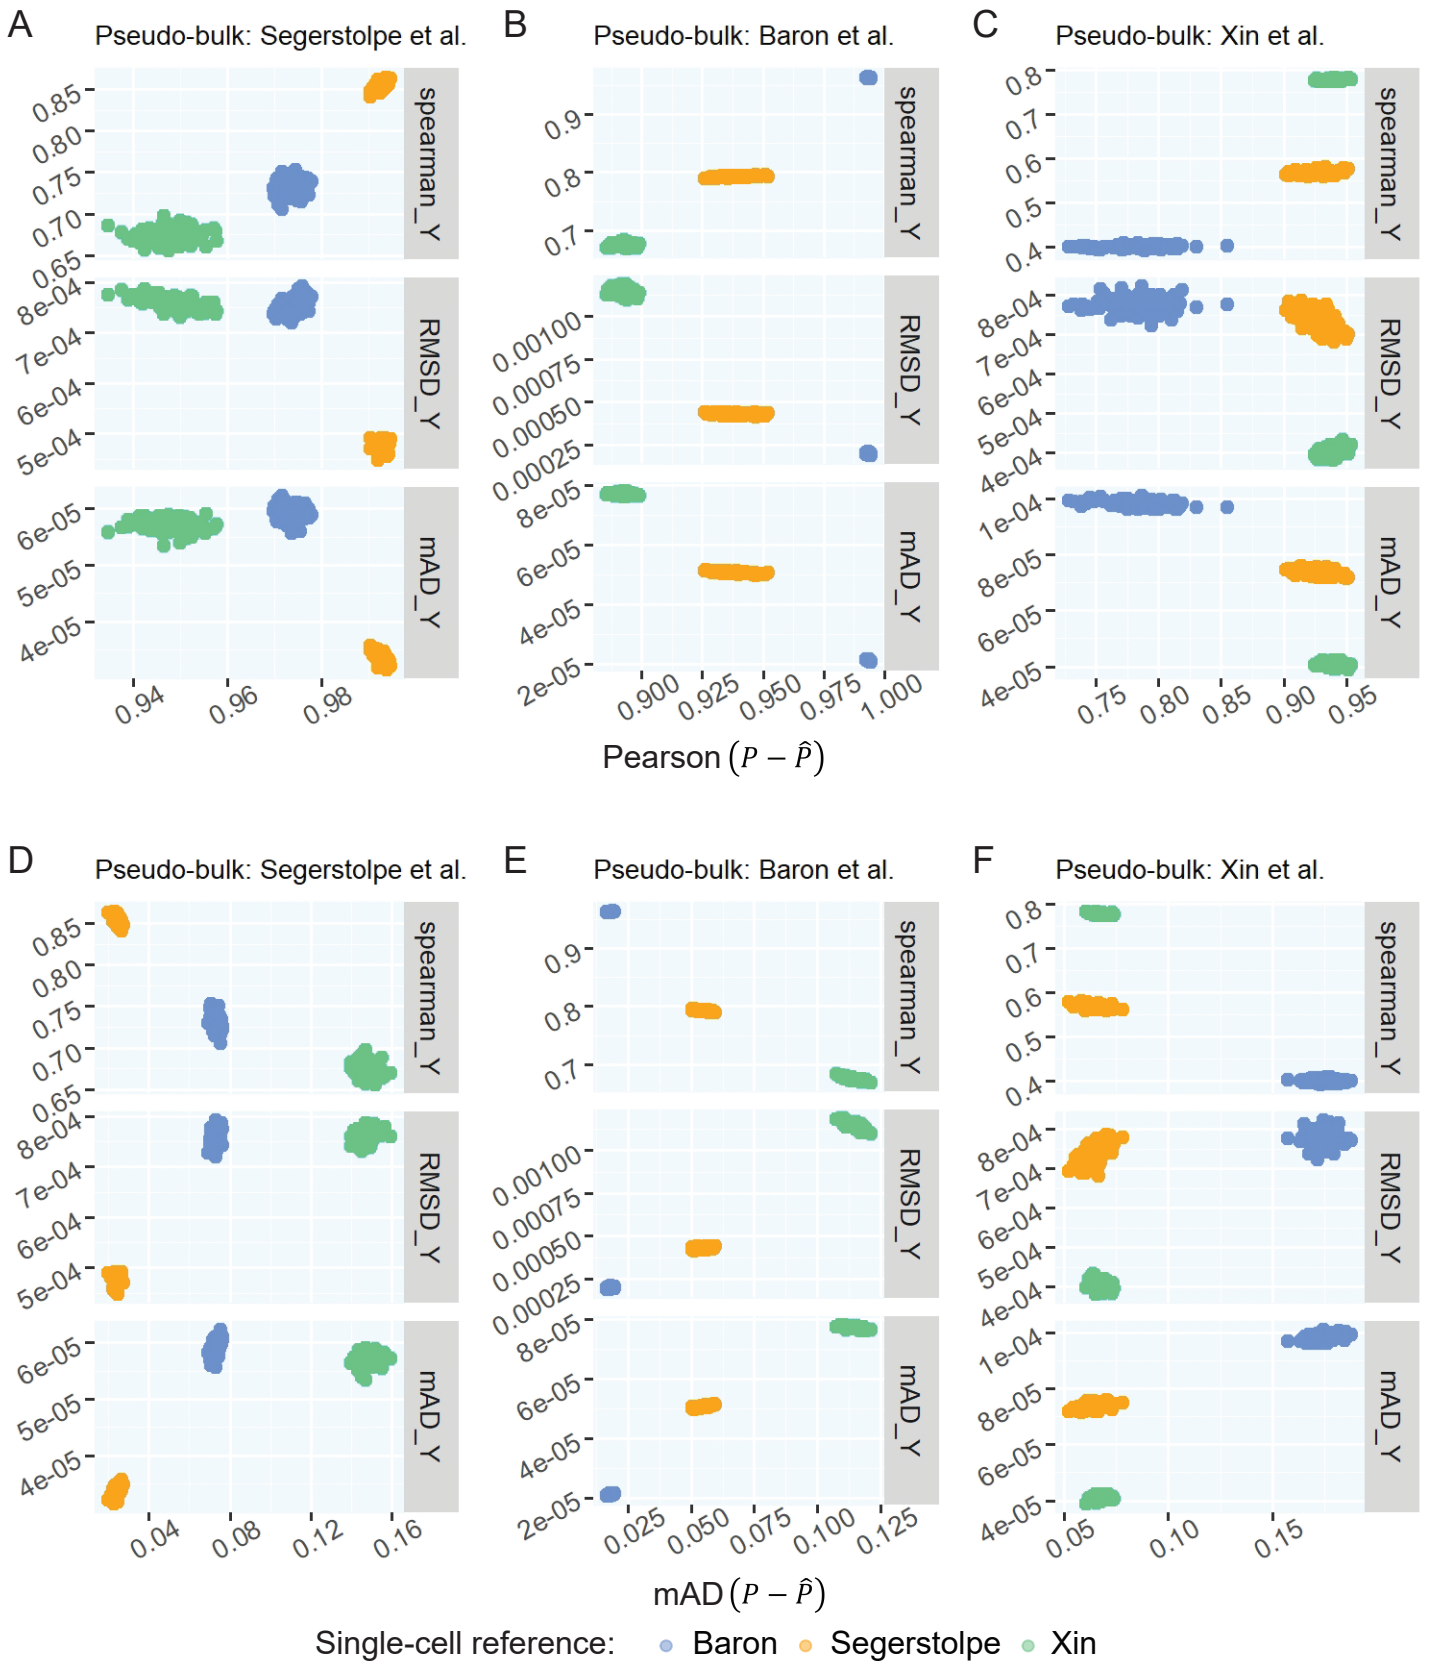

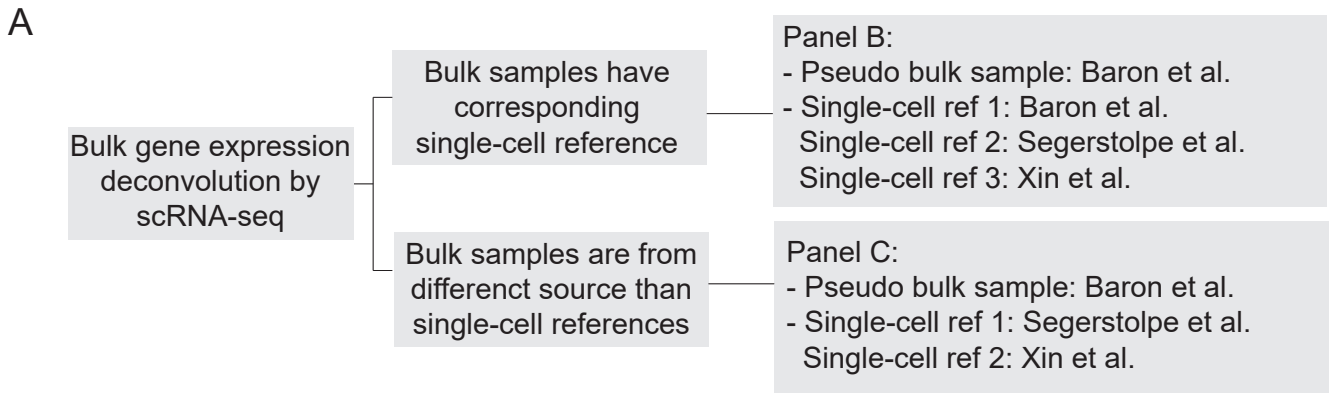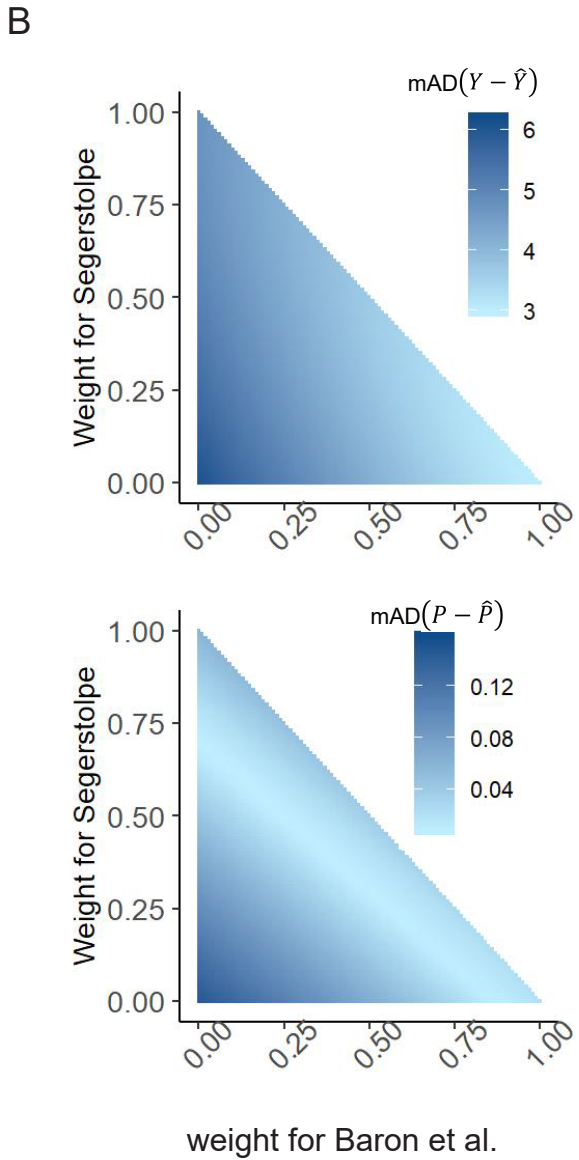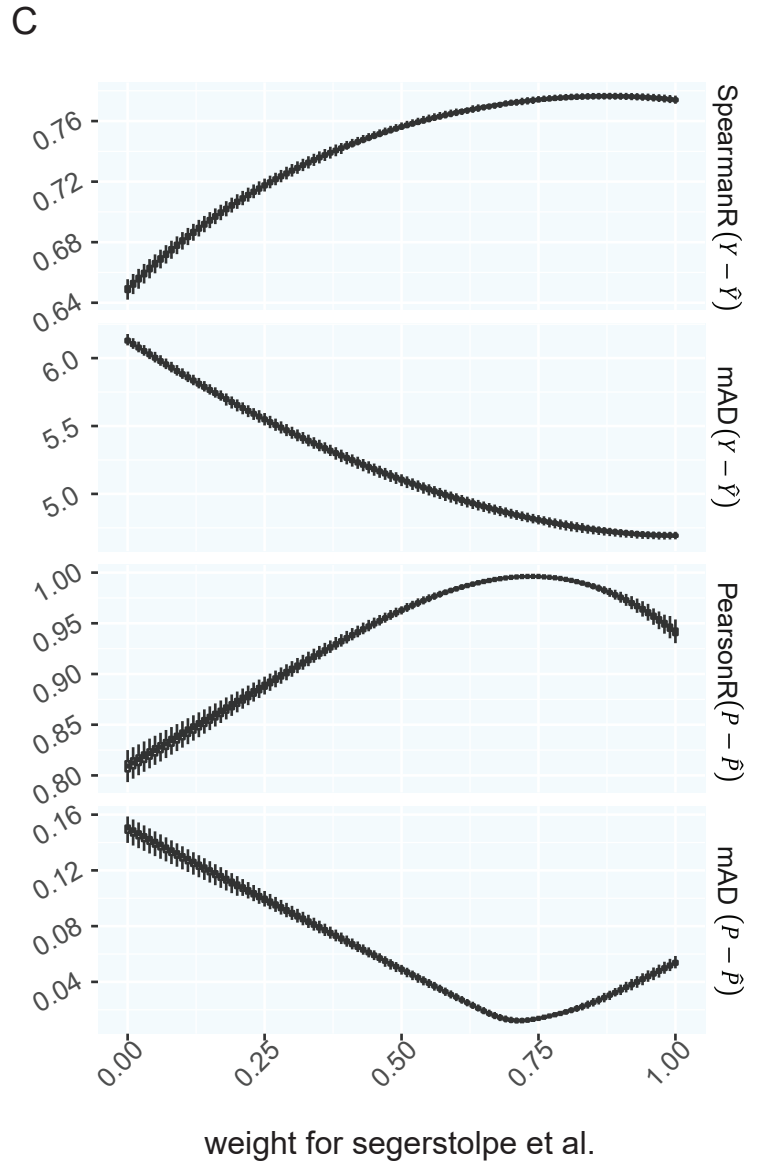

Figure S2

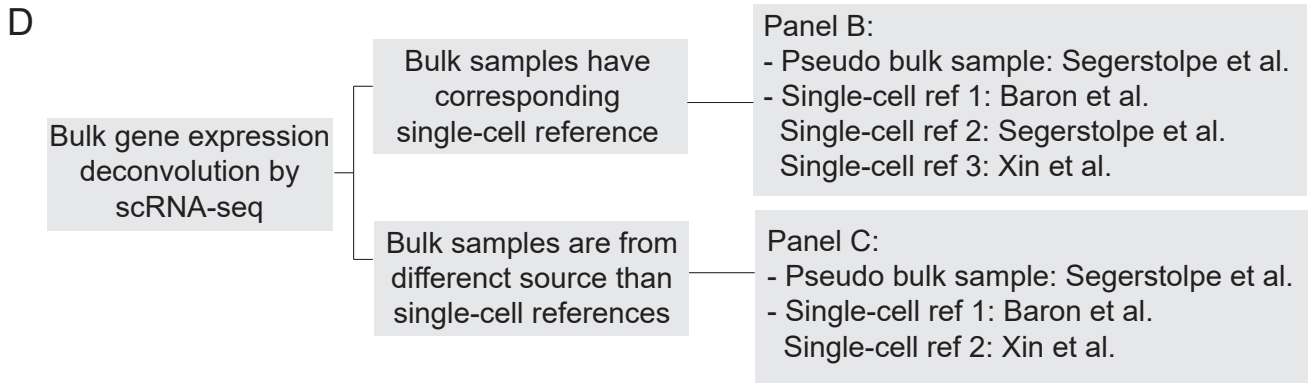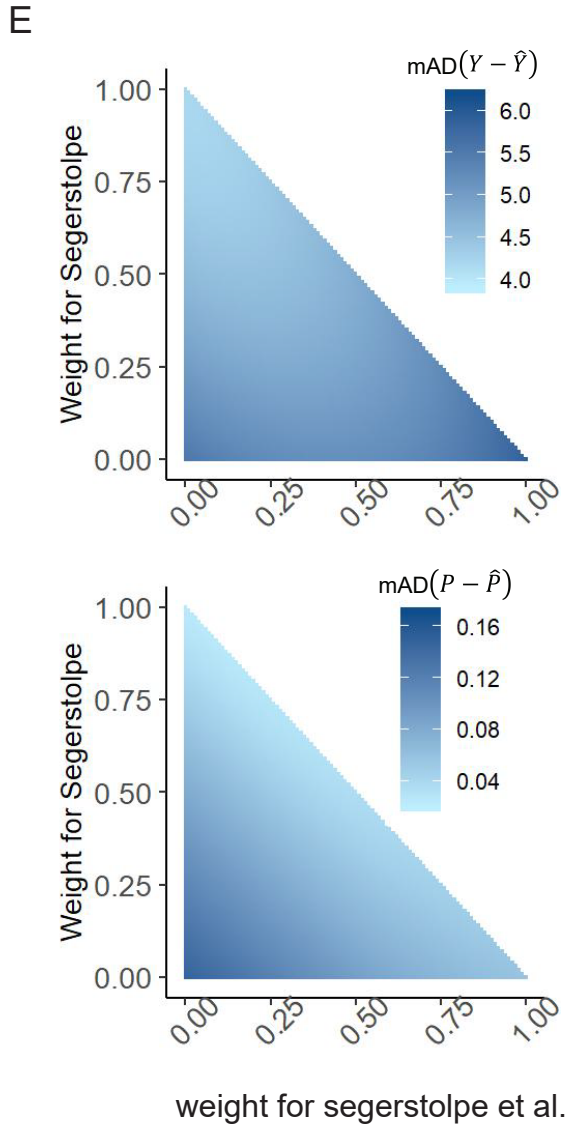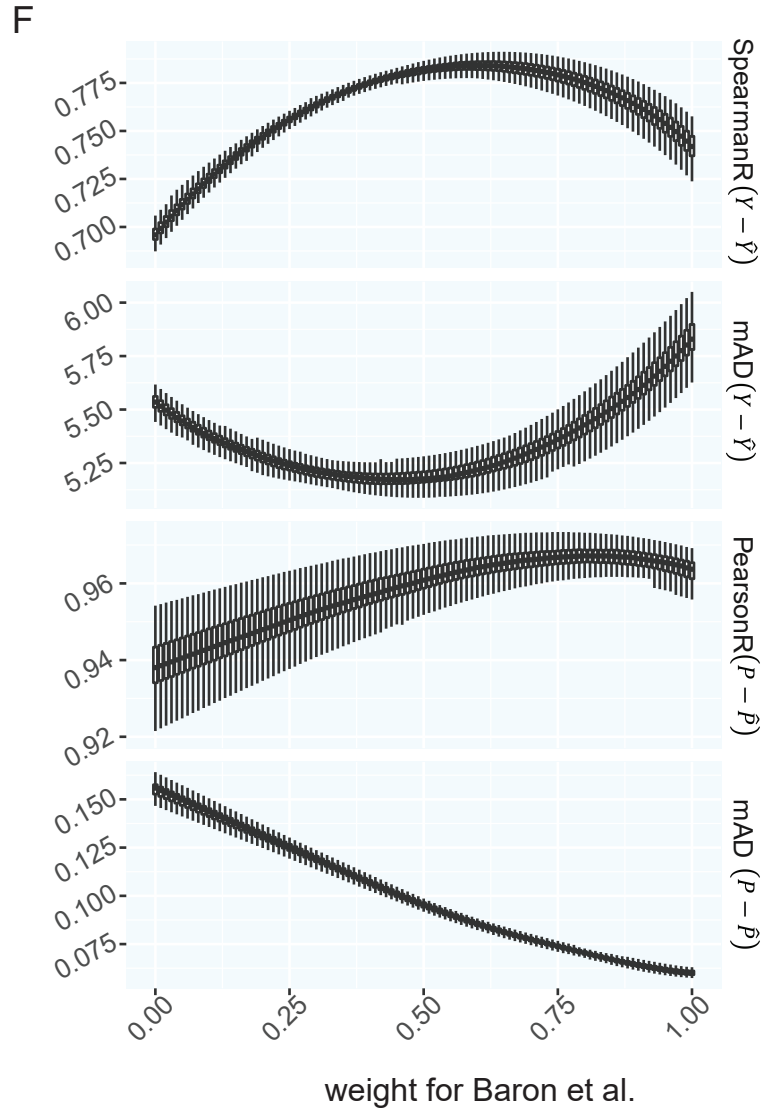

Figure S2

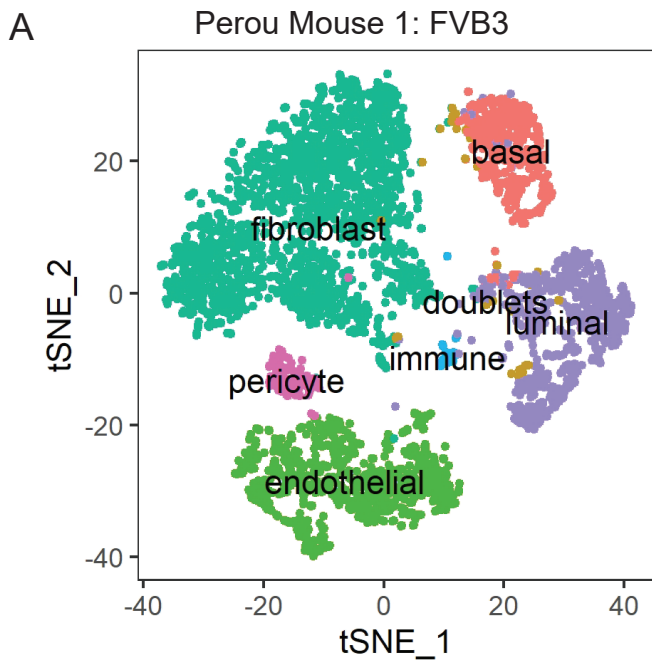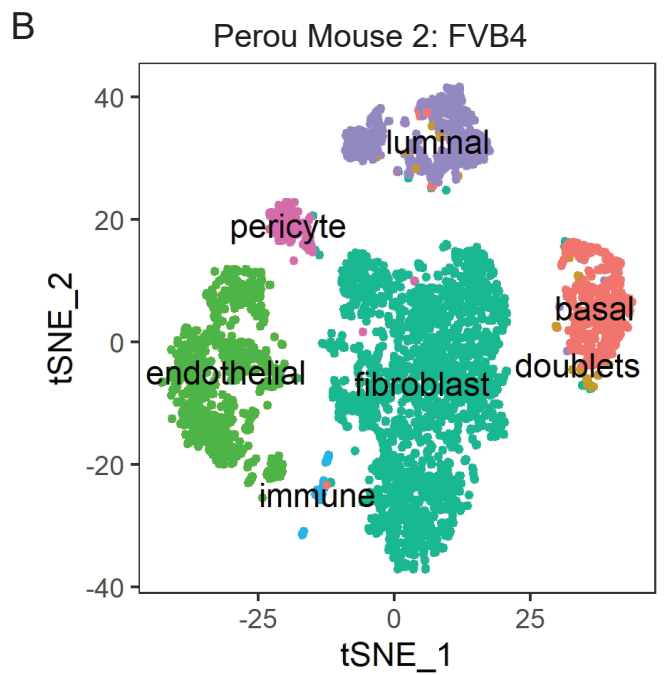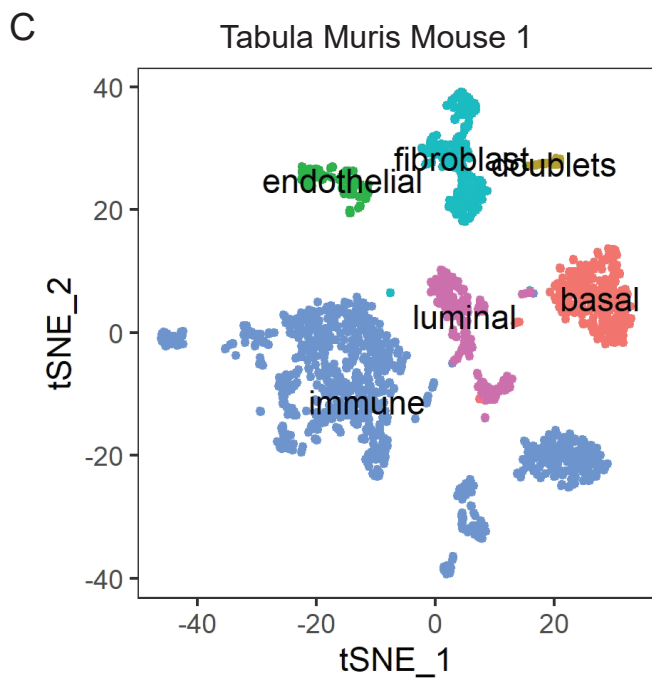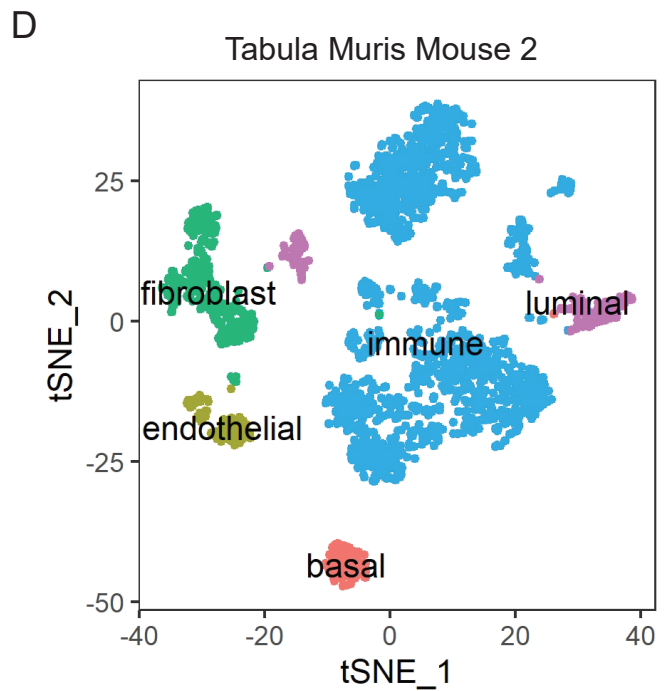

Figure S3

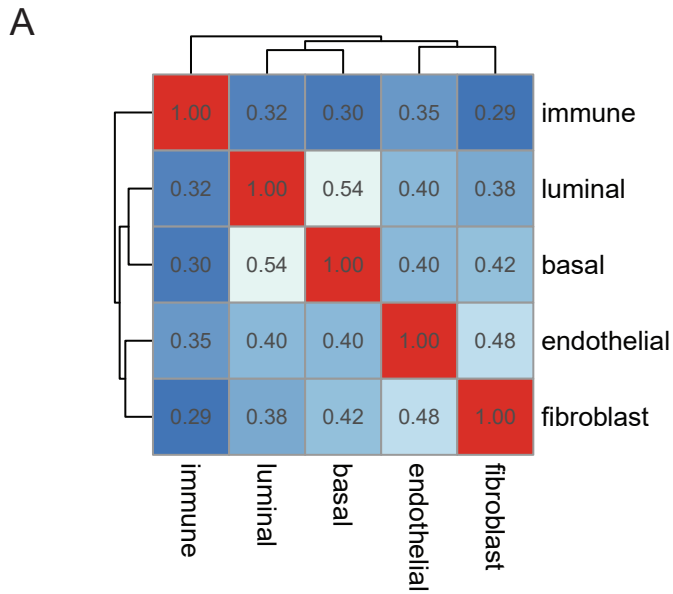

**B** Results without two-step tree-guided deconvolution for 10X bulk samples

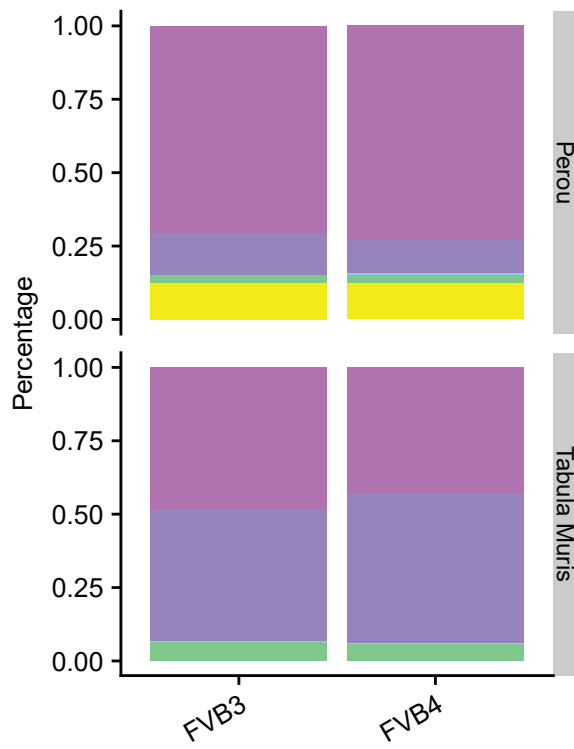

**C** Results without two-step tree-guided deconvolution for Fresh-frozen samples

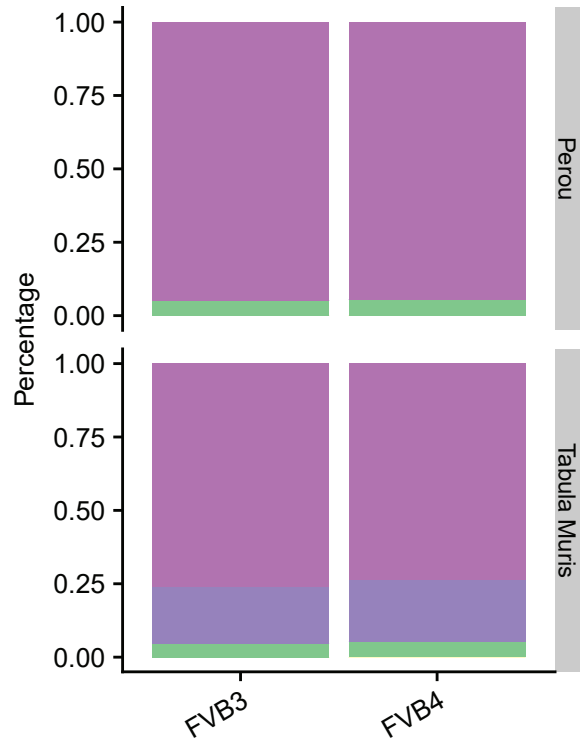

Figure S4

A Before clustering-QC

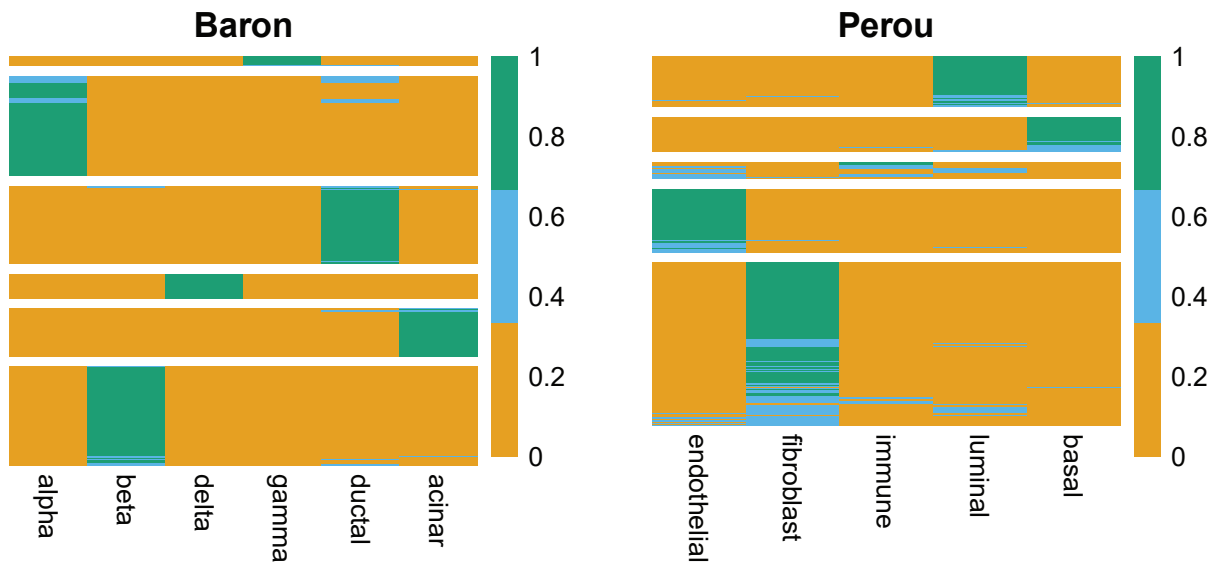

B After clustering-QC

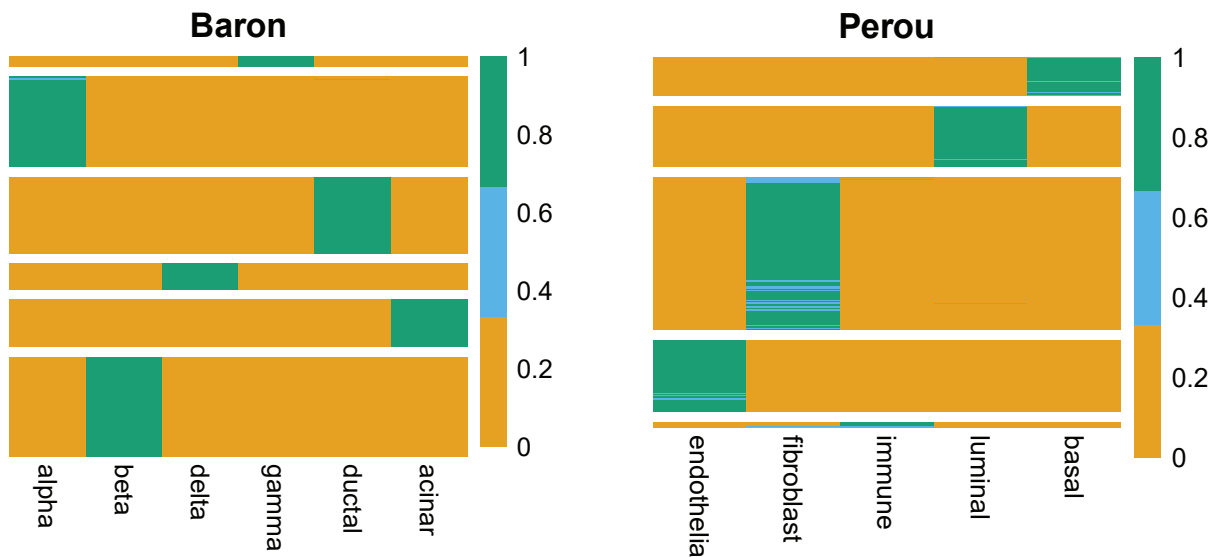

Figure S5

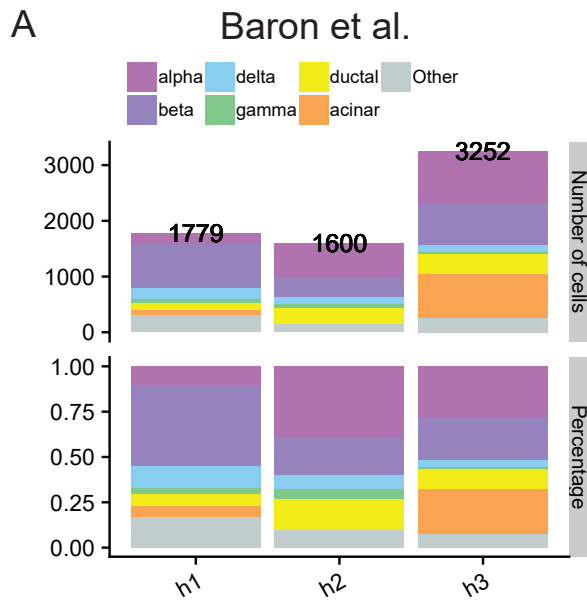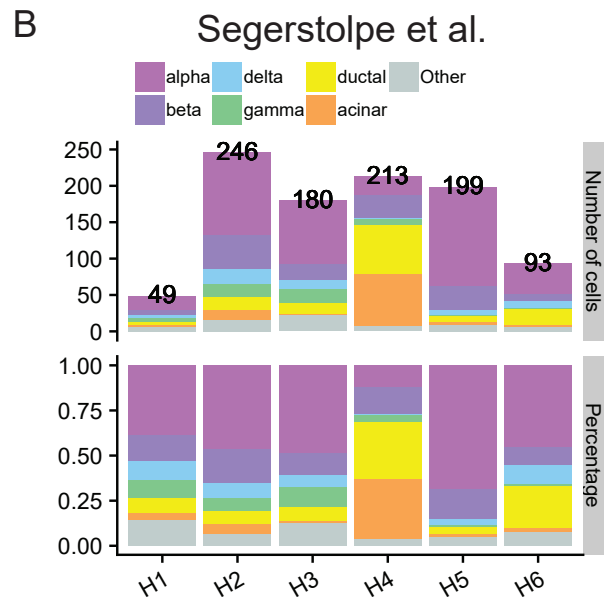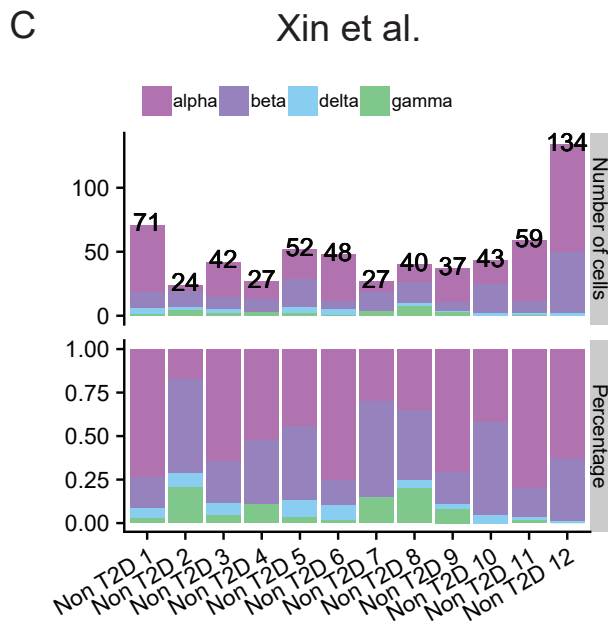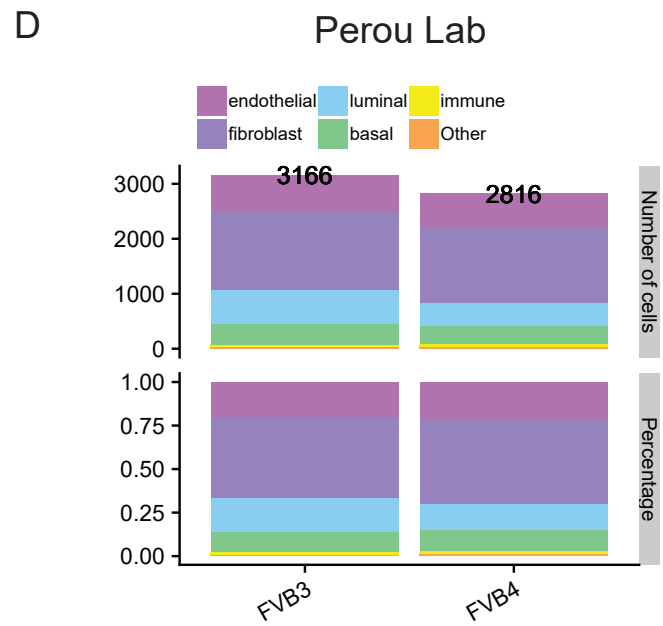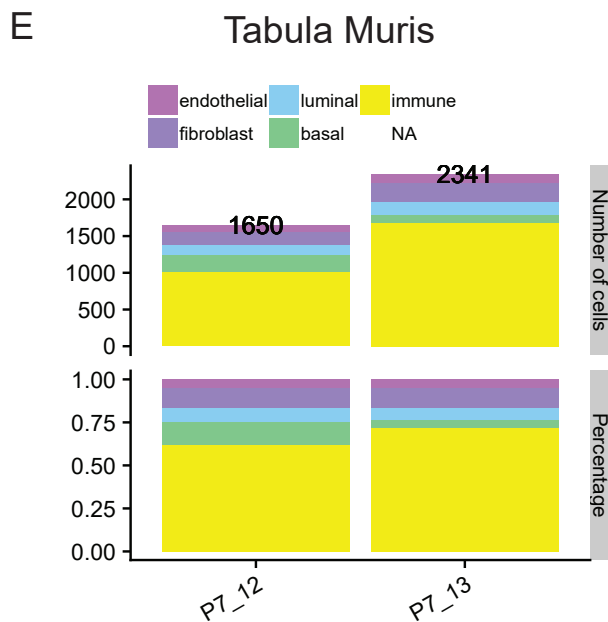

Figure S6

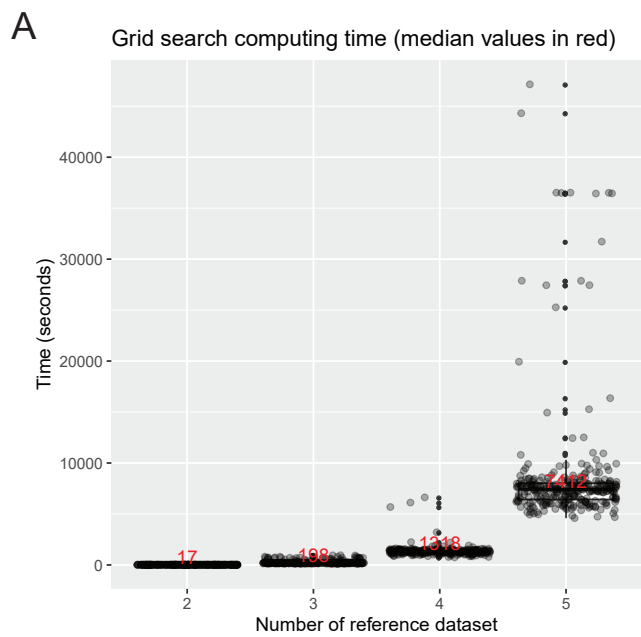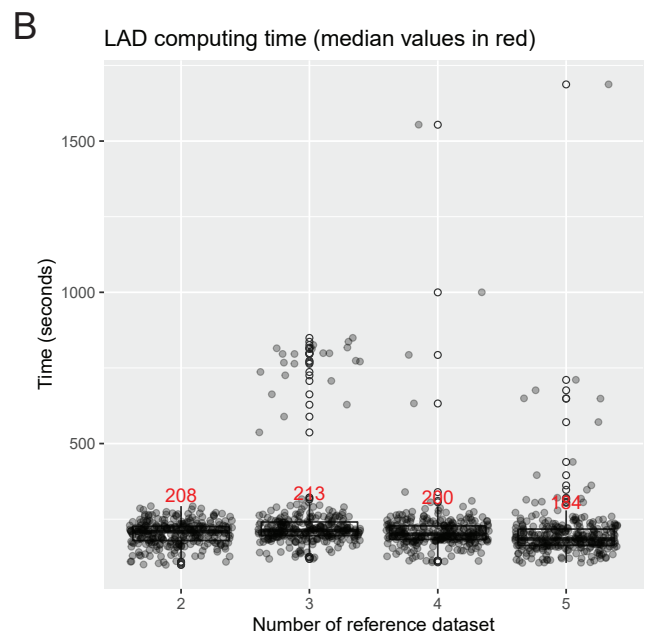

Figure S7
