# Supplementary material for: SCDC: bulk gene expression deconvolution by multiple single-cell RNA sequencing references
Source: PubMed Central journal article supplement — Brief Bioinform. 2020 Jan 10;22(1):416–27. doi: 10.1093/bib/bbz166 (PMC7820884; doi:10.1093/bib/bbz166), 2020-01-10
Supplement: supp_tables_version6_bbz166.pdf [file supp_tables_version6_bbz166.pdf]

**Table S1.** Summary of existing gene-expression deconvolution methods utilizing single-cell sequencing data. The comparisons include single-cell input format, marker-gene requirement, and handling of batch effects.

| Method                                                 | Single-cell input                                                                                                                                                                                                                                       | Marker-gene requirement                                               | Adjusting for technical variation between bulk and single-cell expression.                                                                                                                                                                                                                | Batch effect correction            |
|--------------------------------------------------------|---------------------------------------------------------------------------------------------------------------------------------------------------------------------------------------------------------------------------------------------------------|-----------------------------------------------------------------------|-------------------------------------------------------------------------------------------------------------------------------------------------------------------------------------------------------------------------------------------------------------------------------------------|------------------------------------|
| MuSiC (Wang et al., Nature Communications, 2019)       | Read count matrix (ExpressionSet); RPKM if estimates of cell-type specific total RNA abundance can be provided.                                                                                                                                         | Optional.                                                             | No.                                                                                                                                                                                                                                                                                       | No.                                |
| BseqSC (Baron et al., Cell Systems, 2016)              | Read count matrix (ExpressionSet).                                                                                                                                                                                                                      | Yes                                                                   | No.                                                                                                                                                                                                                                                                                       | No.                                |
| Bisque (Jew et al., bioRxiv, 2019)                     | Read count matrix, (ExpressionSet, Seurat Object).                                                                                                                                                                                                      | Optional (required when scRNA-seq is not available).                  | Gene-specific transformations of bulk expression levels using observed bulk samples and <i>in silico</i> generated pseudo-bulk samples to account for biases in sequencing technologies.                                                                                                  | No.                                |
| CIBERSORTx (Newman et al., Nature Biotechnology, 2019) | TPM, RPKM, FPKM, raw read counts. Regardless of the input, the signature matrix and mixture files should be represented in the same normalization space (i.e., if single cell data input is TPM format, the bulk data input should also be TPM format). | No.                                                                   | Bulk-mode batch correction (B-mode): removes technical differences between a signature matrix derived from purified/sorted bulk samples and an input set of mixture samples; Single-cell batch correction (S-mode): directly adjusts the signature matrix rather than the mixture matrix. | No.                                |
| DWLS (Tsoucas et al., Nature Communications, 2019)     | Read count matrix.                                                                                                                                                                                                                                      | Automatically selects marker genes according to input scRNA-seq data. | No.                                                                                                                                                                                                                                                                                       | No.                                |
| SCDC (this paper)                                      | Read count matrix (ExpressionSet).                                                                                                                                                                                                                      | Optional.                                                             | Optional via a pre-processing step (same as Bisque and CIBERSORTx).                                                                                                                                                                                                                       | Implicitly addressed via ENSEMBLE. |

**Table S2.** Benchmark of deconvolution results using simulated pseudo bulk samples of human pancreatic islets with only one single-cell reference. The pseudo bulk samples were constructed by summing up raw read counts across all single cells from (A) Baron et al., (B) Segerstolpe et al., and (C) Xin et al.. The performance of deconvolution was assessed using measurements on the deconvolved and true cell-type proportions. Clustering quality control (CQC) procedure resulted in improved deconvolution accuracy except for the cases involving Xin et al., which has a limited number of single cells per subject. Since only one single-cell reference was adopted in each run, SCDC was applied without ENSEMBLE but was still among the methods with top performance.

(A)

| Pseudo-Bulk  | Single-cell reference (number of cell types used) | Methods             | mAD Before CQC | mAD After CQC | Pearson R Before CQC | Pearson R After CQC | $\Delta$ Pearson R |
|--------------|---------------------------------------------------|---------------------|----------------|---------------|----------------------|---------------------|--------------------|
| Baron et al. | Baron et al. (6 types)                            | MuSiC               | 0.027          | 0.026         | 0.97                 | 0.966               | 0.00               |
|              |                                                   | Bseq-SC             | 0.056          | 0.057         | 0.878                | 0.879               | 0.00               |
|              |                                                   | Bisque              | 0.021          | 0.021         | 0.982                | 0.98                | 0.00               |
|              |                                                   | CIBERSORTx          | 0.041          | 0.041         | 0.966                | 0.958               | -0.01              |
|              |                                                   | CIBERSORTx (B mode) | 0.035          | 0.039         | 0.96                 | 0.949               | -0.01              |
|              |                                                   | CIBERSORTx (S mode) | 0.053          | 0.044         | 0.955                | 0.966               | 0.01               |
|              |                                                   | DWLS                | 0.022          | 0.025         | 0.980                | 0.975               | -0.01              |
|              |                                                   | <b>SCDC</b>         | <b>0.029</b>   | <b>0.03</b>   | <b>0.961</b>         | <b>0.96</b>         | <b>0.00</b>        |
|              | Segerstolpe et al. (6 types)                      | MuSiC               | 0.056          | 0.049         | 0.892                | 0.9                 | 0.01               |
|              |                                                   | Bseq-SC             | 0.073          | 0.08          | 0.808                | 0.789               | -0.02              |
|              |                                                   | Bisque              | 0.087          | 0.092         | 0.671                | 0.65                | -0.02              |
|              |                                                   | CIBERSORTx          | 0.084          | 0.076         | 0.852                | 0.87                | 0.02               |
|              |                                                   | CIBERSORTx (B mode) | 0.094          | 0.087         | 0.815                | 0.834               | 0.02               |
|              |                                                   | CIBERSORTx (S mode) | 0.065          | 0.044         | 0.972                | 0.973               | 0.00               |
|              |                                                   | DWLS                | 0.127          | 0.115         | 0.365                | 0.486               | 0.12               |
|              |                                                   | <b>SCDC</b>         | <b>0.05</b>    | <b>0.045</b>  | <b>0.912</b>         | <b>0.924</b>        | <b>0.01</b>        |
|              | Xin et al. (4 types)                              | MuSiC               | 0.147          | 0.117         | 0.541                | 0.717               | 0.18               |
|              |                                                   | Bseq-SC             | 0.144          | 0.154         | 0.434                | 0.435               | 0.00               |
|              |                                                   | Bisque*             | 0.099          | 0.101         | 0.813                | 0.814               | 0.00               |
|              |                                                   | CIBERSORTx          | 0.190          | 0.198         | 0.324                | 0.230               | -0.09              |
|              |                                                   | CIBERSORTx (B mode) | 0.182          | 0.191         | 0.26                 | 0.186               | -0.07              |
|              |                                                   | CIBERSORTx (S mode) | 0.176          | 0.137         | 0.684                | 0.75                | 0.07               |
|              |                                                   | DWLS                | 0.153          | 0.150         | 0.512                | 0.558               | 0.05               |
|              |                                                   | <b>SCDC</b>         | <b>0.06</b>    | <b>0.085</b>  | <b>0.964</b>         | <b>0.973</b>        | <b>0.01</b>        |

\*Bisque only used part of the subjects due to the encountered error when including subjects with a missing cell-type.

(B)

| Pseudo-Bulk        | Single-cell reference (number of cell types used) | Methods                  | mAD Before CQC | mAD After CQC | Pearson R Before CQC | Pearson R After CQC | $\Delta$ Pearson R |
|--------------------|---------------------------------------------------|--------------------------|----------------|---------------|----------------------|---------------------|--------------------|
| Segerstolpe et al. | Baron et al. (6 types)                            | MuSiC                    | 0.083          | 0.082         | 0.915                | 0.918               | 0.00               |
|                    |                                                   | Bseq-SC                  | 0.089          | 0.085         | 0.895                | 0.899               | 0.00               |
|                    |                                                   | Bisque                   | 0.094          | 0.096         | 0.642                | 0.627               | -0.02              |
|                    |                                                   | CIBERSORTx               | 0.085          | 0.081         | 0.955                | 0.955               | 0.00               |
|                    |                                                   | CIBERSORTx (B mode)      | 0.09           | 0.084         | 0.953                | 0.955               | 0.00               |
|                    |                                                   | CIBERSORTx (S mode)      | 0.091          | 0.082         | 0.913                | 0.911               | 0.00               |
|                    |                                                   | DWLS                     | 0.074          | 0.083         | 0.745                | 0.702               | 0.074              |
|                    |                                                   | <b>SCDC w/o ENSEMBLE</b> | <b>0.078</b>   | <b>0.078</b>  | <b>0.922</b>         | <b>0.924</b>        | <b>0.00</b>        |
|                    | Segerstolpe et al. (6 types)                      | MuSiC                    | 0.029          | 0.027         | 0.968                | 0.975               | 0.01               |
|                    |                                                   | Bseq-SC                  | 0.064          | 0.06          | 0.875                | 0.898               | 0.02               |
|                    |                                                   | Bisque                   | 0.035          | 0.035         | 0.963                | 0.962               | 0.00               |
|                    |                                                   | CIBERSORTx               | 0.06           | 0.061         | 0.949                | 0.951               | 0.00               |
|                    |                                                   | CIBERSORTx (B mode)      | 0.056          | 0.055         | 0.962                | 0.963               | 0.00               |
|                    |                                                   | CIBERSORTx (S mode)      | 0.053          | 0.063         | 0.953                | 0.932               | -0.02              |
|                    |                                                   | DWLS                     | 0.033          | 0.050         | 0.971                | 0.905               | -0.07              |
|                    |                                                   | <b>SCDC w/o ENSEMBLE</b> | <b>0.032</b>   | <b>0.031</b>  | <b>0.961</b>         | <b>0.969</b>        | <b>0.01</b>        |
|                    | Xin et al. (4 types)                              | MuSiC                    | 0.096          | 0.091         | 0.933                | 0.94                | 0.01               |
|                    |                                                   | Bseq-SC                  | 0.075          | 0.076         | 0.92                 | 0.927               | 0.01               |
|                    |                                                   | Bisque*                  | 0.063          | 0.064         | 0.944                | 0.943               | 0.00               |
|                    |                                                   | CIBERSORTx               | 0.083          | 0.084         | 0.910                | 0.901               | -0.01              |
|                    |                                                   | CIBERSORTx (B mode)      | 0.07           | 0.073         | 0.927                | 0.92                | -0.01              |
|                    |                                                   | CIBERSORTx (S mode)      | 0.139          | 0.195         | 0.582                | 0.294               | -0.29              |
|                    |                                                   | DWLS                     | 0.057          | 0.066         | 0.938                | 0.920               | -0.02              |
|                    |                                                   | <b>SCDC w/o ENSEMBLE</b> | <b>0.113</b>   | <b>0.133</b>  | <b>0.97</b>          | <b>0.965</b>        | <b>-0.01</b>       |

\*Bisque only used part of the subjects due to the encountered error when including subjects with a missing cell-type.

(C)

| Pseudo-Bulk | Single-cell reference (number of cell types used) | Methods                  | mAD Before CQC | mAD After CQC | Pearson R Before CQC | Pearson R After CQC | $\Delta$ Pearson R |
|-------------|---------------------------------------------------|--------------------------|----------------|---------------|----------------------|---------------------|--------------------|
| Xin et al.  | Baron et al. (4 types)                            | MuSiC                    | 0.189          | 0.188         | 0.71                 | 0.711               | 0.00               |
|             |                                                   | Bseq-SC                  | 0.185          | 0.182         | 0.72                 | 0.723               | 0.00               |
|             |                                                   | Bisque                   | 0.091          | 0.098         | 0.874                | 0.855               | -0.02              |
|             |                                                   | CIBERSORTx               | 0.180          | 0.177         | 0.733                | 0.736               | 0.00               |
|             |                                                   | CIBERSORTx (B mode)      | 0.184          | 0.18          | 0.722                | 0.724               | 0.00               |
|             |                                                   | CIBERSORTx (S mode)      | 0.169          | 0.153         | 0.765                | 0.781               | 0.02               |
|             |                                                   | DWLS                     | 0.093          | 0.086         | 0.874                | 0.875               | 0.00               |
|             |                                                   | <b>SCDC w/o ENSEMBLE</b> | <b>0.188</b>   | <b>0.187</b>  | <b>0.71</b>          | <b>0.711</b>        | <b>0.00</b>        |
|             | Segerstolpe et al. (4 types)                      | MuSiC                    | 0.071          | 0.075         | 0.92                 | 0.915               | -0.01              |
|             |                                                   | Bseq-SC                  | 0.154          | 0.153         | 0.757                | 0.758               | 0.00               |
|             |                                                   | Bisque                   | 0.078          | 0.076         | 0.902                | 0.897               | -0.01              |
|             |                                                   | CIBERSORTx               | 0.161          | 0.163         | 0.756                | 0.751               | -0.01              |
|             |                                                   | CIBERSORTx (B mode)      | 0.167          | 0.17          | 0.74                 | 0.736               | 0.00               |
|             |                                                   | CIBERSORTx (S mode)      | 0.089          | 0.063         | 0.903                | 0.94                | 0.04               |
|             |                                                   | DWLS                     | 0.093          | 0.067         | 0.824                | 0.927               | 0.10               |
|             |                                                   | <b>SCDC w/o ENSEMBLE</b> | <b>0.067</b>   | <b>0.072</b>  | <b>0.929</b>         | <b>0.925</b>        | <b>0.00</b>        |
|             | Xin et al. (4 types)                              | MuSiC                    | 0.035          | 0.035         | 0.976                | 0.976               | 0.00               |
|             |                                                   | Bseq-SC                  | 0.066          | 0.062         | 0.894                | 0.906               | 0.01               |
|             |                                                   | Bisque*                  | 0.066          | 0.066         | 0.924                | 0.925               | 0.00               |
|             |                                                   | CIBERSORTx               | 0.050          | 0.051         | 0.959                | 0.957               | 0.00               |
|             |                                                   | CIBERSORTx (B mode)      | 0.055          | 0.053         | 0.956                | 0.957               | 0.00               |
|             |                                                   | CIBERSORTx (S mode)      | 0.054          | 0.056         | 0.957                | 0.958               | 0.00               |
|             |                                                   | DWLS                     | 0.023          | 0.026         | 0.991                | 0.990               | 0.00               |
|             |                                                   | <b>SCDC w/o ENSEMBLE</b> | <b>0.072</b>   | <b>0.081</b>  | <b>0.938</b>         | <b>0.925</b>        | <b>-0.01</b>       |

\*Bisque only used part of the subjects due to the encountered error when including subjects with a missing cell-type.

**Table S3.** Benchmark of deconvolution results using simulated pseudo bulk samples of human pancreatic islets with multiple single-cell references. The pseudo bulk samples were constructed by summing up raw read counts across all single cells from (A) Baron et al., (B) Segerstolpe et al., and (C) Xin et al.. Multiple single-cell references (from Baron et al., Segerstolpe et al., and Xin et al.) were adopted to aid deconvolution in three ways: (i) single-cell data from different sources were naively pooled and were used as input; (ii) single-cell data from different sources were first corrected for batch effect using MNN and then used as input; and (iii) ENSEMBLE framework was adopted to integrate deconvolution results from different single-cell references. The performance of deconvolution was assessed using measurements on the deconvolved and true cell-type proportions. Pooling single cells with and without batch correction generally resulted in unstable performance, while the ENSEMBLE method by SCDC resulted in Pearson correlations above 0.9 consistently across all three scenarios, highlighting its performance stability.

(A)

| Pseudo-Bulk  | Single-cell reference (number of cell types used)       | Method adopted                                 | mAD          | Pearson R    |
|--------------|---------------------------------------------------------|------------------------------------------------|--------------|--------------|
| Baron et al. | Pooled single cells from three studies (6 types)        | MuSiC                                          | 0.123        | 0.418        |
|              |                                                         | Bseq-SC                                        | 0.108        | 0.698        |
|              |                                                         | Bisque                                         | 0.061        | 0.841        |
|              |                                                         | CIBERSORTx                                     | 0.038        | 0.963        |
|              |                                                         | CIBERSORTx (B mode)                            | 0.053        | 0.922        |
|              |                                                         | CIBERSORTx (S mode)                            | 0.092        | 0.843        |
|              |                                                         | DWLS                                           | 0.181        | 0.756        |
|              | MNN corrected single cells from three studies (6 types) | MuSiC                                          | 0.082        | 0.776        |
|              |                                                         | Bseq-SC                                        | 0.098        | 0.707        |
|              |                                                         | Bisque                                         | 0.050        | 0.878        |
|              |                                                         | CIBERSORTx                                     | 0.032        | 0.986        |
|              |                                                         | CIBERSORTx (B mode)                            | 0.036        | 0.994        |
|              |                                                         | CIBERSORTx (S mode)                            | 0.046        | 0.915        |
|              | ENSEMBLE from three studies (6 types)                   | DWLS                                           | 0.187        | -0.089       |
|              |                                                         | SCDC (PearsonR on $P$ ):<br>$w_1 = 1, w_2 = 0$ | 0.031        | <b>0.952</b> |
|              | SCDC (SpearmanR on $Y$ ):<br>$w_1 = 1, w_2 = 0$         | 0.032                                          | <b>0.949</b> |              |

(B)

| Pseudo-Bulk        | Single-cell reference<br>(number of cell types used)    | Method adopted                                     | mAD   | Pearson R    |
|--------------------|---------------------------------------------------------|----------------------------------------------------|-------|--------------|
| Segerstolpe et al. | Pooled single cells from three studies (6 types)        | MuSiC                                              | 0.056 | 0.897        |
|                    |                                                         | Bseq-SC                                            | 0.083 | 0.694        |
|                    |                                                         | Bisque                                             | 0.059 | 0.876        |
|                    |                                                         | CIBERSORTx                                         | 0.069 | 0.968        |
|                    |                                                         | CIBERSORTx (B mode)                                | 0.071 | 0.961        |
|                    |                                                         | CIBERSORTx (S mode)                                | 0.087 | 0.911        |
|                    |                                                         | DWLS                                               | 0.078 | 0.795        |
|                    | MNN corrected single cells from three studies (6 types) | MuSiC                                              | 0.096 | 0.931        |
|                    |                                                         | Bseq-SC                                            | 0.131 | 0.537        |
|                    |                                                         | Bisque                                             | 0.047 | 0.948        |
|                    |                                                         | CIBERSORTx                                         | 0.102 | 0.838        |
|                    |                                                         | CIBERSORTx (B mode)                                | 0.087 | 0.868        |
|                    |                                                         | CIBERSORTx (S mode)                                | 0.058 | 0.951        |
|                    | ENSEMBLE from three studies (6 types)                   | SCDC (PearsonR on $P$ ):<br>$w_1 = 0.3, w_2 = 0.7$ | 0.029 | <b>0.977</b> |
|                    |                                                         | SCDC (SpearmanR on $Y$ ):<br>$w_1 = 0, w_2 = 1$    | 0.029 | <b>0.971</b> |

(C)

| Pseudo-Bulk | Single-cell reference<br>(number of cell types used)    | Method adopted                                                  | mAD   | Pearson R    |
|-------------|---------------------------------------------------------|-----------------------------------------------------------------|-------|--------------|
| Xin et al.  | Pooled single cells from three studies (4 types)        | MuSiC                                                           | 0.068 | 0.906        |
|             |                                                         | Bseq-SC                                                         | 0.117 | 0.828        |
|             |                                                         | Bisque                                                          | 0.063 | 0.938        |
|             |                                                         | CIBERSORTx                                                      | 0.173 | 0.740        |
|             |                                                         | CIBERSORTx (B mode)                                             | 0.178 | 0.727        |
|             |                                                         | CIBERSORTx (S mode)                                             | 0.066 | 0.909        |
|             |                                                         | DWLS                                                            | 0.088 | 0.878        |
|             | MNN corrected single cells from three studies (4 types) | MuSiC                                                           | 0.078 | 0.939        |
|             |                                                         | Bseq-SC                                                         | 0.199 | 0.691        |
|             |                                                         | Bisque                                                          | 0.067 | 0.943        |
|             |                                                         | CIBERSORTx                                                      | 0.084 | 0.891        |
|             |                                                         | CIBERSORTx (B mode)                                             | 0.089 | 0.905        |
|             |                                                         | CIBERSORTx (S mode)                                             | 0.082 | 0.917        |
|             | ENSEMBLE from three studies (4 types)                   | SCDC (PearsonR on $P$ ):<br>$w_1 = 0.15, w_2 = 0.15, w_3 = 0.7$ | 0.055 | <b>0.960</b> |
|             |                                                         | SCDC (SpearmanR on $Y$ ):<br>$w_1 = 0, w_2 = 0, w_3 = 1$        | 0.073 | <b>0.934</b> |

**Table S4.** ENSEMBLE weight selection results for the human pancreatic islet bulk samples. The weights are presented for 51 healthy donors and 26 diabetic donors separately. SCDC selects weights via the method of least absolute deviation (LAD) regression, grid search to minimize the mAD of  $Y$  and  $\hat{Y}$ , and grid search to maximize the Spearman correlation of  $Y$  and  $\hat{Y}$ .

|                           | <b>Metrics</b>              | <b>Weight for Baron et al.</b> | <b>Weight for Segerstolpe et al.</b> | <b>RMSD (Y)</b> | <b>mAD (Y)</b> | <b>Spearman R (Y)</b> |
|---------------------------|-----------------------------|--------------------------------|--------------------------------------|-----------------|----------------|-----------------------|
| 51<br>Healthy<br>samples  | LAD                         | 0.17                           | 0.83                                 | 12.630          | 5.834          | 0.649                 |
|                           | mAD ( $Y, \hat{Y}$ )        | 0.24                           | 0.76                                 | 12.684          | 5.829          | 0.652                 |
|                           | Spearman R ( $Y, \hat{Y}$ ) | 0.40                           | 0.60                                 | 13.020          | 5.851          | 0.655                 |
| 26<br>Diabetic<br>samples | LAD                         | 0.33                           | 0.67                                 | 11.509          | 5.494          | 0.687                 |
|                           | mAD ( $Y, \hat{Y}$ )        | 0.38                           | 0.62                                 | 11.562          | 5.492          | 0.688                 |
|                           | Spearman R ( $Y, \hat{Y}$ ) | 0.48                           | 0.52                                 | 11.755          | 5.501          | 0.689                 |

**Table S5.** Associating cell-type proportions with HbA1c levels in human pancreatic islet samples. A linear regression model (deconvolved cell-type proportion ~ HbA1c + age + BMI + sex) is adopted for each cell type separately. SCDC through ENSEMBLE (weights are derived via grid search to maximize Spearman correlation of  $Y$  and  $\hat{Y}$ , shown in Table S4) derived a p-value of 0.0018 for the association between the HbA1c levels and the beta cell proportions, more significant than those from deconvolution without ENSEMBLE.

| Cell type (% As Outcome) |              | Estimate       | Std. Error    | p-value using ENSEMBLE | p-value using Baron et al. | p-value using Segerstolpe et al. |
|--------------------------|--------------|----------------|---------------|------------------------|----------------------------|----------------------------------|
| alpha                    | (Intercept)  | 0.7782         | 0.2124        | 0.0005                 | 0.0001                     | 0.0398                           |
|                          | HbA1c        | -0.0066        | 0.0284        | 0.8159                 | 0.4346                     | 0.6449                           |
|                          | age          | -0.0010        | 0.0020        | 0.6119                 | 0.7861                     | 0.9251                           |
|                          | BMI          | -0.0104        | 0.0081        | 0.2040                 | 0.2033                     | 0.7888                           |
|                          | sexFemale    | 0.0463         | 0.0438        | 0.2940                 | 0.4485                     | 0.1597                           |
| beta                     | (Intercept)  | 0.4430         | 0.1127        | 0.0002                 | 0.0316                     | 0.0000                           |
|                          | <b>HbA1c</b> | <b>-0.0488</b> | <b>0.0150</b> | <b>0.0018</b>          | <b>0.0380</b>              | <b>0.0310</b>                    |
|                          | age          | 0.0021         | 0.0010        | 0.0483                 | 0.2291                     | 0.2332                           |
|                          | BMI          | -0.0045        | 0.0043        | 0.3019                 | 0.6331                     | 0.0590                           |
|                          | sexFemale    | -0.0679        | 0.0233        | 0.0047                 | 0.1952                     | 0.0040                           |
| delta                    | (Intercept)  | 0.0537         | 0.0098        | 0.0000                 | 0.0000                     | 0.0000                           |
|                          | HbA1c        | -0.0011        | 0.0013        | 0.4214                 | 0.4243                     | 0.4527                           |
|                          | age          | -0.0001        | 0.0001        | 0.1134                 | 0.1344                     | 0.1256                           |
|                          | BMI          | -0.0011        | 0.0004        | 0.0051                 | 0.0058                     | 0.0059                           |
|                          | sexFemale    | 0.0000         | 0.0020        | 0.9948                 | 0.8213                     | 0.8473                           |
| gamma                    | (Intercept)  | 0.0108         | 0.0122        | 0.3763                 | 0.3556                     | 0.3827                           |
|                          | HbA1c        | 0.0012         | 0.0016        | 0.4749                 | 0.5547                     | 0.4622                           |
|                          | age          | 0.0001         | 0.0001        | 0.3369                 | 0.2919                     | 0.3508                           |
|                          | BMI          | -0.0007        | 0.0005        | 0.1370                 | 0.1281                     | 0.1467                           |
|                          | sexFemale    | -0.0018        | 0.0025        | 0.4680                 | 0.4248                     | 0.4588                           |
| acinar                   | (Intercept)  | -0.0067        | 0.0804        | 0.9335                 | 0.8045                     | 0.4762                           |
|                          | HbA1c        | 0.0205         | 0.0107        | 0.0598                 | 0.0283                     | 0.0517                           |
|                          | age          | -0.0015        | 0.0007        | 0.0466                 | 0.1660                     | 0.0476                           |
|                          | BMI          | 0.0017         | 0.0031        | 0.5842                 | 0.7244                     | 0.2173                           |
|                          | sexFemale    | 0.0308         | 0.0166        | 0.0673                 | 0.0516                     | 0.0574                           |
| ductal                   | (Intercept)  | -0.2790        | 0.1735        | 0.1122                 | 0.2490                     | 0.1091                           |
|                          | HbA1c        | 0.0348         | 0.0232        | 0.1380                 | 0.2929                     | 0.1213                           |
|                          | age          | 0.0005         | 0.0016        | 0.7802                 | 0.8249                     | 0.5345                           |
|                          | BMI          | 0.0150         | 0.0066        | 0.0270                 | 0.0567                     | 0.0513                           |
|                          | sexFemale    | -0.0074        | 0.0358        | 0.8361                 | 0.4099                     | 0.9686                           |



**Table S6.** ENSEMBLE weight selection results for the mouse mammary gland bulk samples. Single-cell reference dataset from the same source as the bulk samples gains more weight.

|                                               | <b>Metrics</b>              | <b>Weight for<br/>Tabula Muris</b> | <b>Weight for<br/>Perou</b> | <b>RMSD (Y)</b> | <b>mAD<br/>(Y)</b> | <b>Spearman<br/>R (Y)</b> |
|-----------------------------------------------|-----------------------------|------------------------------------|-----------------------------|-----------------|--------------------|---------------------------|
| Pooled<br>single cells<br>after<br>suspension | LAD                         | 0.18                               | 0.82                        | 18.116          | 7.658              | 0.634                     |
|                                               | mAD ( $Y, \hat{Y}$ )        | 0.16                               | 0.84                        | 18.064          | 7.657              | 0.633                     |
|                                               | Spearman R ( $Y, \hat{Y}$ ) | 0.32                               | 0.68                        | 18.794          | 7.690              | 0.636                     |
| Fresh-<br>frozen                              | LAD                         | 0.15                               | 0.85                        | 25.102          | 7.959              | 0.532                     |
|                                               | mAD ( $Y, \hat{Y}$ )        | 0.16                               | 0.84                        | 25.108          | 7.958              | 0.532                     |
|                                               | Spearman R ( $Y, \hat{Y}$ ) | 0.44                               | 0.56                        | 26.148          | 8.030              | 0.539                     |
